# Supplementary material
Source: MDPI journal article supplement (https://www.mdpi.com/2304-6767/11/11/259)
Supplement: s1 [file s1]

**“Assessment of Pediatricians' and General Practitioners' Knowledge and Practice Regarding Oral Health, Dental Caries and its Prevention in Children – questionnaire”**

**I. Demographic and professional characteristics**

1. Gender: ☐ Male ☐ Female
2. Age group (years): ☐ <35 ☐ 35 – 44 ☐ 44 – 54 ☐ >55
3. Academic qualification: ☐ DM ☐ Master of Science ☐ Doctor of Philosophy
4. Specializations in medicine: ☐ General/family physicians ☐ Pediatricians
5. Type of practice setting: ☐ Community health care practice  
☐ Concession health care practice
6. Working experience (years): ☐ 1-5 ☐ 6-10  
☐ 11-20 ☐ ≤ 21
7. Number of children patients per day: ☐ <10 ☐ 11-20 ☐ 21-50 ☐ ≥51
8. Patient care per day (hours): ☐ 1-8 ☐ >8

**II. Oral health-related practice and attitudes. Please mark the answer that best reflects your practice or opinion regarding the promotion of oral health in children.**

9. Conducting tooth examination: ☐ Yes ☐ No
10. Conducting oral mucosa examination: ☐ Yes ☐ No
11. Reason for not conducting oral examinations:  
☐ Lack of time ☐ Lack of knowledge ☐ Other
12. Patients' management with oral mucosal lesions: ☐ Yes ☐ No
13. Reason for non-treatment of patients with oral mucosal lesions:  
☐ Lack of time ☐ Lack of knowledge ☐ Other
14. Referral of patients with oral mucosal lesions: ☐ Dentists ☐ Oral medicine specialist  
☐ Pediatric dentist ☐ Other
15. Self-assessment of personal knowledge about oral health: ☐ Excellent ☐ Good  
☐ Average ☐ Poor  
☐ Very poor
16. Perceived education on oral health topics during medical graduate and postgraduate:  
☐ Yes ☐ No
17. Interested in further education on the topic of oral health in children:  
☐ Yes ☐ No ☐ Do not know
18. Physicians should actively participate in the prevention of oral and dental changes in children:  
☐ Yes ☐ No ☐ Do not know
19. Referral child patients to the dentist: ☐ Yes ☐ No
20. The age at which you typically refer a child patient for a dental examination:  
☐ <1 year ☐ 1-3 years  
☐ >3 years ☐ 6 years

**III. Knowledge of signs and symptoms of teething. Please mark the answer that best reflects your opinion.**

21. Fever: ☐ Yes ☐ No ☐ Do not know
22. Diarrhea: ☐ Yes ☐ No ☐ Do not know
23. Runny nose: ☐ Yes ☐ No ☐ Do not know
24. Disturbed sleep: ☐ Yes ☐ No ☐ Do not know
25. Gum rubbing: ☐ Yes ☐ No ☐ Do not know
26. Increased salivation and drooling: ☐ Yes ☐ No ☐ Do not know
27. Loss of appetite: ☐ Yes ☐ No ☐ Do not know

**IV. Knowledge of oral health, dental caries and its prevention in children. Please mark the answer that best reflects your opinion.**

28. Bacteria that cause decay can spread from mother to child:  
☐ Yes ☐ No ☐ Do not know
29. Advanced dental caries is a chronic condition:  
☐ Yes ☐ No ☐ Do not know
30. The development of carious lesions causes the destruction of dental hard tissue:  
☐ Yes ☐ No ☐ Do not know
31. Prolonged breastfeeding increases the risk of having dental caries:  
☐ Yes ☐ No ☐ Do not know
32. Untreated dental decay could affect the general health of the child:  
☐ Yes ☐ No ☐ Do not know
33. The potential for remineralization of early-stage carious lesions:  
☐ Yes ☐ No ☐ Do not know
34. The appropriate time to initiate tooth brushing for children:  
☐ Eruption of all teeth  
☐ Eruption of multiple teeth  
☐ First tooth eruption  
☐ Do not know
35. The recommended age at which children can cease parental-supervised toothbrushing:  
☐ 3 years ☐ 6 years  
☐ Prepuberty ☐ Do not know
36. The recommended age for children to start using a rice grain-sized smear of fluoridated toothpaste:  
☐ 6-12 month ☐ >3 years  
☐ >6 years ☐ Do not know
37. The recommended amount of fluoride toothpaste for children aged 3 to 6 years:  
☐ Regular (1-2 cm) ☐ Pea size  
☐ Grain of rice ☐ Do not know

**V. An alternative to fluorides in caries prevention. Please mark the answer that best reflects your opinion.**

38. Knowledge of non-fluoride alternatives for dental caries prevention: ☐ Yes ☐ No
39. Knowledge of the caries preventive effects of casein phosphopeptide: ☐ Yes ☐ No
40. Knowledge of the efficacy of pit and fissure sealants as caries preventive measures:  
☐ Yes ☐ No
